# Supplementary material
Source: HighWire-hosted journal article supplement (https://www.cmaj.ca/highwire/filestream/58044/field_highwire_adjunct_files/0/rabiesfact--f.pdf)
Supplement: rabiesfact--f.pdf [file rabiesfact--f.pdf]

## FICHE D'INFORMATION DU JAMC

## Le risque de rage chez les voyageurs

**Comment attrape-t-on la rage?**

La rage est une maladie mortelle évitable transmise par contact avec un animal à sang chaud infecté. La plupart des gens sont mordus, mais dans certains cas, ils ont pu être exposés, sans qu'il y ait morsure, à la salive d'un animal atteint de la rage, qui a léché, par exemple, une rupture de la peau ou les muqueuses des yeux, du nez ou de la bouche, ou qui a égratigné la peau. Même si le cas est extrêmement rare, la rage peut être transmise par exposition à un virus de la rage en aérosol dans une caverne pleine de chauve-souris infectées.

Dans les pays en développement, le chien demeure le principal vecteur de la rage, suivi du singe. Dans la plupart des pays industrialisés, la mouffette, le raton laveur, la chauve-souris et le renard en sont les principaux vecteurs.

**Les voyageurs risquent-ils d'être infectés par la rage?**

Même si la rage est rare chez les voyageurs internationaux, beaucoup de décès liés à la rage survenus dans le monde industrialisé mettaient en cause des personnes qui avaient été infectées en voyage. Au Canada, il y a eu 1 seul cas de rage chez un voyageur depuis 70 ans.

**Quels pays présentent un risque élevé de rage?**

La rage sévit à l'échelle mondiale, à quelques exceptions près comme l'Antarctique, la Nouvelle-Zélande, le Japon, Taïwan, certains pays d'Europe (p. ex., la Suède et la Norvège), quelques îles des Caraïbes et Hawaii. C'est en Afrique et en Asie, particulièrement en Inde, que l'incidence de la rage est la plus élevée. La plupart des décès causés par la rage surviennent en Inde et en Asie du Sud-Est, en Afrique et en Amérique latine. La Thaïlande compte quelque 10 millions de chiens errants, et l'on estime que 10 % des chiens à Bangkok sont infectés par la rage.

**Pour qui le risque est-il le plus élevé?**

Les personnes qui se rendent dans les régions rurales ou à des endroits à fortes populations de chiens errants, dans un pays où la rage est endémique, sont les plus exposées. Les enfants (les garçons plus que les filles) sont 4 fois plus susceptibles que les adultes d'être atteints de la rage parce qu'ils risquent davantage

d'être mordus et sont moins susceptibles de le signaler. Les personnes qui pratiquent la spéléologie et d'autres activités dans des cavernes sont à risque élevé, tout comme celles qui sont exposées sans protection à l'extérieur, le soir ou la nuit, dans les régions rurales, comme celles qui font de la bicyclette, du camping ou du bénévolat.

**Quel est le risque d'avoir la rage à la suite d'une morsure de chien subie pendant un voyage?**

Les morsures de chien sont courantes chez les touristes. Au cours d'une étude, on a signalé 13 morsures de chien pour 1000 visiteurs en Thaïlande. Beaucoup de chiens dans les pays étrangers ne sont pas vaccinés contre la rage. Le risque d'infection à la suite d'une exposition à un animal atteint de la rage s'établit à environ 15 %, mais il varie (de 0,1 % à 60 %) en fonction des facteurs d'exposition de la morsure. Ces facteurs comprennent le nombre de morsures, la profondeur des morsures et les stades de la maladie chez l'animal infecté. Les lésions au haut du corps ou à la tête présentent le plus grand risque de transmission.

**Comment éviter la rage?**

La principale façon d'éviter la rage consiste à éviter tout contact avec des animaux sauvages ou errants. À l'étranger, il faut présumer que tout chien errant a la rage, même si l'animal semble amical. Il faut éviter tout contact avec des chauve-souris et ne jamais en toucher une. En outre, il ne faut pas toucher aux singes et il ne faut pas transporter d'aliments lorsqu'on visite des endroits où se réunissent des singes.

**Que faire si l'on subit une morsure en voyage?**

À l'étranger, une personne qui est mordue, égratignée ou léchée aux muqueuses ou à une plaie ouverte par un animal doit laver immédiatement la plaie soigneusement et vigoureusement à l'eau savonneuse et avec un composé de povidone-iodine dans la mesure du possible. Il faut essayer de consulter immédiatement un médecin pour recevoir un vaccin post-exposition (5 doses en 30 jours pour les personnes qui n'ont pas déjà reçu un vaccin préexposition) et une immunoglobuline humaine contre la rage (1 seule dose

dans les 7 jours suivant la première dose de vaccin pour ceux qui n'ont jamais été vaccinés). La période d'incubation de la rage est habituellement de 20 à 60 jours, mais elle peut être plus longue (plus d'un an) et c'est pourquoi il n'est jamais trop tard pour se faire traiter avant l'apparition des symptômes. Les morsures de chauve-souris méritent une attention spéciale. Les chauve-souris ont de petites dents et peuvent infliger des morsures ou des égratignures sans laisser de plaie notable. Par conséquent, si l'on trouve une chauve-souris dans une pièce où une personne dormait, il faut considérer que la personne a été exposée à la rage.

**Qui doit se faire vacciner avant de voyager à l'étranger?**

Le vaccin contre la rage réduit considérablement le risque d'infection lorsqu'il est administré avant ou après une exposition possible. Les personnes qui se font vacciner avant de partir en voyage auront quand même besoin de 2 doses supplémentaires après une exposition possible à la rage. Elles n'auront toutefois pas besoin d'immunoglobuline humaine contre la rage, qui, souvent, n'est pas disponible dans les pays en développement. C'est la principale raison pour laquelle on recommande un vaccin avant de partir en voyage. Comme le vaccin contre la rage coûte cher, on recommande un vaccin préexposition uniquement pour les personnes qui se rendent dans des régions où la rage est endémique (en particulier pour un séjour prolongé), sont susceptibles de venir en contact avec des animaux sauvages ou errants et n'auront pas accès rapidement (dans les 3 jours) à des soins médicaux. On recommande aussi le vaccin préexposition aux personnes qui se rendent dans des pays où la prophylaxie postexposition n'est pas disponible ou n'est pas sécuritaire. L'Agence de la santé publique du Canada recommande vivement aux voyageurs d'obtenir une évaluation individuelle des risques en consultant un médecin ou une clinique de médecine des voyageurs avant leur départ ([www.santevoyage.gc.ca](http://www.santevoyage.gc.ca)).

**Melanie Di Quinzio MD MSc**

Division de la médecine interne  
Université d'Ottawa

**Anne McCarthy MD MSc**

Division des maladies infectieuses  
Hôpital d'Ottawa  
Ottawa (Ont.)

Article évalué par les pairs.

Competing interests: Aucun déclaré.
